# Supplementary material for: Translational gene expression control in Chlamydia trachomatis
Source: PLoS One. 2022 Jan 27;17(1):e0257259. doi: 10.1371/journal.pone.0257259 (PMC8794103; doi:10.1371/journal.pone.0257259)
Supplement: S1 Table — (PDF) [file pone.0257259.s005.pdf]

| Sequence                                                                                                                                                                                                                                                                                                                                                                                                                                                                                                                                                                                                                                                                                                                                                                                                                                                                                                                         | Primer name              | Template                  |
|----------------------------------------------------------------------------------------------------------------------------------------------------------------------------------------------------------------------------------------------------------------------------------------------------------------------------------------------------------------------------------------------------------------------------------------------------------------------------------------------------------------------------------------------------------------------------------------------------------------------------------------------------------------------------------------------------------------------------------------------------------------------------------------------------------------------------------------------------------------------------------------------------------------------------------|--------------------------|---------------------------|
| <b>T5-E-Clover-3xFlag</b>                                                                                                                                                                                                                                                                                                                                                                                                                                                                                                                                                                                                                                                                                                                                                                                                                                                                                                        |                          |                           |
| ctataggtacccgtgataccagcatcgtctgtgaccccttggcagcaccctgctaaggaggtaacaacaagatggtgagcaagggcgaggagctgttcaccgg<br>gggtgtgcccatactcgttgcagctggagcggcgacgtataacgcgccacaagttcagcgtccgcggcgaggcgagggcgatgccaccaacgccaagctgacccctg<br>aagttcatctgcaaccacgcgcaagctgcccgtgccctggcccaccctcgtgaccaccttcggctacgcgctggccctgctcagccgctaccccagaccatga<br>agcagcacgactcttcaagtcgcgcacgcccgaagctacgtccaggagcgacacatctcttcaaggacgcagctacctacaagaccgcgcgaggtgaa<br>gttcgagggcgacacccctggtgaaccgatcgagctgaaggcatcgactcaaggaggacgcgcaacatcctggggcacaagctggagttacaacttcaacagc<br>cacaacgtctataatcagcggcgcaagaagcgaagcgcacatcaagctcaactcaagatccgcacacagcttgaggacggcagcgtgcagctcgcgcacacat<br>accagcagaacacccccatcggcgacggcccgctgctgctgccgcacaacacatcactgagccatcagtcgccctgagcaagacccccaacgagaagcgcga<br>tcaactggtcctgctggagttcgtgaccgcgcgcgggattacacatggcatggacgagctgtacaagatggactacaagaccatgacggtgatataaagat<br>catgacatcgattacaaggtgacgattaaaggtgac         | gBlock E-Clover-Flag     | N/A                       |
| cgattaaggatgacatgtgattcgcgtagga                                                                                                                                                                                                                                                                                                                                                                                                                                                                                                                                                                                                                                                                                                                                                                                                                                                                                                  | 5' E-clover-Flag bb      | p2TK2-SW2                 |
| tcaccggtacctatagtgagtcgtatctctagtaattgttatcc                                                                                                                                                                                                                                                                                                                                                                                                                                                                                                                                                                                                                                                                                                                                                                                                                                                                                     | 3' E-Clover-Flag bb      |                           |
| <b>Tet-riboJ-E-clover-3xFlag</b>                                                                                                                                                                                                                                                                                                                                                                                                                                                                                                                                                                                                                                                                                                                                                                                                                                                                                                 |                          |                           |
| tgttgataacccgtattacatttaagaccactttcaacatttaagttgttttctaatacgcgatgatgaattcaaggccgaataagaagctggctctgcac<br>cttgggtgatcaaaataattcgactgtgtgtaataatggcgcacatactacagtagtaggtgtttcccttctctcttttagcgacttgatgctcttgatcttc<br>caatacgcacacctaaagtataatgcccacacgctgagtgcatataatgattctctataatgaaaaaccttggcgcaataaaggctaatgtatttcgaga<br>gttcatcactgtttttctgtaggcgctgtactaaatgtacttttgcctccatcgcatgattttagtaagcacatctaaaacttttagcttattacgtaaaa<br>aatcttgcgcagctttccctcttcaaggcgcaaaagtgtgtggtcctatctaacatctcaatggcgaagcgtcgagcaagcccgctattttttacatg<br>coaatacaatgataggctgctctaacactagctcttggcgagtttaacgggtgttaaaaccttcgattccgacctcaataagcagctcattagcgtctgtaaac<br>actttacttttatctaactctagacatcatttaactcctaaattttgttgacactctatcattgatagagttattttaccaactcctatcagtgatagagaaaag<br>agctgtcacccgagtgcttccggtctgatgagtcctgtaggacgaacacgctctcaacaataattttgtttaaggtgataccagcatcgtcttgatgccct<br>tggcagacccctgctaaggaggtacaacaagatggtgagcaagggcgagga | gBlock Tet-riboJ-E       | N/A                       |
| atggtgagcaagggcgagagctgttcaac                                                                                                                                                                                                                                                                                                                                                                                                                                                                                                                                                                                                                                                                                                                                                                                                                                                                                                    | 5' tet-riboJ-E bb        | T5-E-Clover-3xFlag        |
| atgtaatacggttatccacagaatcaggggataacg                                                                                                                                                                                                                                                                                                                                                                                                                                                                                                                                                                                                                                                                                                                                                                                                                                                                                             | 3' tet-riboJ-E bb        |                           |
| <b>T5-E-hctB-3xFlag</b>                                                                                                                                                                                                                                                                                                                                                                                                                                                                                                                                                                                                                                                                                                                                                                                                                                                                                                          |                          |                           |
| gatggtgagcaacatggtgggagtacaaaaaaacgcagc                                                                                                                                                                                                                                                                                                                                                                                                                                                                                                                                                                                                                                                                                                                                                                                                                                                                                          | 5' E-HctBi               | L2 genomic                |
| tgtagtccattctagcgactaatttcaatttaattgttgacgccagctgtgagc                                                                                                                                                                                                                                                                                                                                                                                                                                                                                                                                                                                                                                                                                                                                                                                                                                                                           | 3' E-HctBi               |                           |
| agtctgataatggaactacaagaacatgacggtgattataaagatcatgacatcg                                                                                                                                                                                                                                                                                                                                                                                                                                                                                                                                                                                                                                                                                                                                                                                                                                                                          | 5' E-HctB bb             | T5-E-Clover-3xFlag        |
| ccaacatggtgctcaccatcttgtgttacctccttagcaggggtgc                                                                                                                                                                                                                                                                                                                                                                                                                                                                                                                                                                                                                                                                                                                                                                                                                                                                                   | 3' E-HctB bb             |                           |
| <b>Tet-riboJ-E-hctB-3xFlag</b>                                                                                                                                                                                                                                                                                                                                                                                                                                                                                                                                                                                                                                                                                                                                                                                                                                                                                                   |                          |                           |
| gatggtgagcaacatggtgggagtacaaaaaaacgcagc                                                                                                                                                                                                                                                                                                                                                                                                                                                                                                                                                                                                                                                                                                                                                                                                                                                                                          | 5' tet-riboJ-HctBi       | L2 genomic                |
| tgtagtccattctagcgactaatttcaatttaattgttgacgccagctgtgagc                                                                                                                                                                                                                                                                                                                                                                                                                                                                                                                                                                                                                                                                                                                                                                                                                                                                           | 3' tet-riboJ-HctBi       |                           |
| agtctgataatggaactacaagaacatgacggtgattataaagatcatgacatcg                                                                                                                                                                                                                                                                                                                                                                                                                                                                                                                                                                                                                                                                                                                                                                                                                                                                          | 5' tet-riboJ-HctB bb     | Tet-riboJ-E-Clover-3xFlag |
| ccaacatggtgctcaccatcttgtgttacctccttagcaggggtgc                                                                                                                                                                                                                                                                                                                                                                                                                                                                                                                                                                                                                                                                                                                                                                                                                                                                                   | 3' tet-riboJ-HctB bb     |                           |
| <b>nprom-E-pgp4-3xFlag</b>                                                                                                                                                                                                                                                                                                                                                                                                                                                                                                                                                                                                                                                                                                                                                                                                                                                                                                       |                          |                           |
| tatttagagaaaaacgttcgggtgataccagcatcgtctgtgaccccttggcagcaccctgctaaggaggtaacaacaagatgcaaaaaaaagaaagtgag<br>ggagcagttttattaaaattgttaagatgtgaaaaaagatttcccggaattagacctaaaaatacagagttaacaaggaagaaagtaactttcttaattctccc<br>ttagaactctaccataaaaagtgctcactaattctagggactgcttcaacaataagaaaactcttttaggtatttcccgagctctcctgttttgaaaaattag<br>aggataacagttttaaagctaaaaaagcgtttgattatgcttatcttctgtcagaaaagacatgttttccaaggtgaaatggactacaagaacatgacggtga<br>ttataaagatcatgacatcgattacaaggtgacgattaaacaacttact                                                                                                                                                                                                                                                                                                                                                                                                                                     | gBlock E-pgp4-flag       | N/A                       |
| cgaactgtttctcctaataataaaaacctataagaaaaaacctcaataaaaaattgtttaagc                                                                                                                                                                                                                                                                                                                                                                                                                                                                                                                                                                                                                                                                                                                                                                                                                                                                  | 5' E-pgp4-flag bb        | p2TK2-SW2                 |
| tgacgattaaacaacttactctaactgttgagttgatttgcacaccttag                                                                                                                                                                                                                                                                                                                                                                                                                                                                                                                                                                                                                                                                                                                                                                                                                                                                               | 3' E-pgp4-flag bb        |                           |
| <b>T5-E-ngLVA-3xFlag, Tet-J-E-ngLVA-3xFlag</b>                                                                                                                                                                                                                                                                                                                                                                                                                                                                                                                                                                                                                                                                                                                                                                                                                                                                                   |                          |                           |
| atggtgagcaaaagcgcaagaagataaacatggcgagcctcgcggcgacccatgaactgcatatttttggcagcattaaacggcgtggattttgataggtggcc<br>agggcactcggcaaccccgcaagatggctatgaagaactgaacctgaaaaagcacaagggcgatctgcagtttagccctggattctgggtgcgcataattggta<br>tgcttttcatagatctgcgcatcggatggcagtgagccgtttcagcggcgagatggtggatggcagcgggctatcagctggcatcgcaacctgacgtttgaa<br>gatgcgcgagcctgacgtgaactatgctatacctataagcgagccatataaaggcgaaagcaggtgaaagcaccggtttccggcgagtgcccg<br>tgatgaccaacgctgacgcggcgaggttggtgcgcgcaaaaaacctatcgcagcgaataaaacctatttagcaaccttttaagtggagctataccacgg<br>caacggcaacgctatcgacgacccgcgcacacacatcactttgcgaacccgtaggcgcgaactatctgaaaaaacagccgagtgatgtgtttcgcgaa<br>accggaactgaacatagcaaaacggaactgaactttaagaatggcagaagcgtttaccgatgtgatggcagtgatgaactgtataaaaggcctgcagcaa<br>acgacgaaaactacgcttttagtgacttag                                                                                                                                           | gBlock neongreenLVA      | N/A                       |
| agtagcttagggatgacatgtgattcgcgttaggaaaaagaggagg                                                                                                                                                                                                                                                                                                                                                                                                                                                                                                                                                                                                                                                                                                                                                                                                                                                                                   | 5' ngLVA bb (T5 and Tet) | Tet-riboJ-E-Clover-3xFlag |
| tgctcaccatcttgtgttacctccttagcaggggtgctgccaaag                                                                                                                                                                                                                                                                                                                                                                                                                                                                                                                                                                                                                                                                                                                                                                                                                                                                                    | 3' ngLVA bb (T5 and Tet) | or T5-E-Clover-3xFlag     |
| <b>euoprom-ngLVA</b>                                                                                                                                                                                                                                                                                                                                                                                                                                                                                                                                                                                                                                                                                                                                                                                                                                                                                                             |                          |                           |
| taacaacaagatggtgagcaaaagcgcaagaagataaacatggcgagc                                                                                                                                                                                                                                                                                                                                                                                                                                                                                                                                                                                                                                                                                                                                                                                                                                                                                 | 5' ngLVAi                | E-ngLVA-3xFlag            |
| catgtcatccctaagctactaaagcgtagtttctgctgtttgctgcagg                                                                                                                                                                                                                                                                                                                                                                                                                                                                                                                                                                                                                                                                                                                                                                                                                                                                                | 3' ngLVAi                |                           |
| aaaaactacgcttttagtgacttaggcgagatccctgtacaatacaatttaccgattaaatagtctc                                                                                                                                                                                                                                                                                                                                                                                                                                                                                                                                                                                                                                                                                                                                                                                                                                                              | 5' euo ngLVA bb          | euoprom-Clover[18]        |
| gcttacaacaagatcacagggtcgaaattcggcatggtgagca                                                                                                                                                                                                                                                                                                                                                                                                                                                                                                                                                                                                                                                                                                                                                                                                                                                                                      | 3' euo ngLVA bb          |                           |
